# Supplementary material for: Ecobody technology: rapid monoclonal antibody screening method from single B cells using cell-free protein synthesis for antigen-binding fragment formation
Source: PubMed Central journal article supplement (PMC5656612; doi:10.1038/s41598-017-14277-0), 2017-10-25
Supplement: 41598_2017_14277_MOESM1_ESM.pdf [file 41598_2017_14277_MOESM1_ESM.pdf]

## **Supplementary Information**

**Ecobody technology: rapid monoclonal antibody screening method  
from single B cells using cell-free protein synthesis for  
antigen-binding fragment formation**

Teruyo Ojima-Kato<sup>1a\*</sup>, Satomi Nagai<sup>1</sup>, Hideo Nakano<sup>1b\*</sup>

<sup>1</sup>*Graduate School of Bioagricultural Sciences, Nagoya University, Furo-cho, Chikusa-ku, Nagoya  
464-8601, Japan*

\* Correspondence should be addressed to

<sup>a</sup> Email: teruyo.ojima@gmail.com, Tel: +81-52-789-4144, Fax: +81-52-789-4145 or

<sup>b</sup> Email: hnakano@agr.nagoya-u.ac.jp, Tel: +81-52-789-4144, Fax: +81-52-789-4145

**Supplementary Table S1. Recovery ratio of *E. coli* expressed proteins.**

| Step                  | Protein concentration (mg/mL) | Total volume (mL) | Amount of protein (mg) | Recovery ratio (%) |
|-----------------------|-------------------------------|-------------------|------------------------|--------------------|
| Solubilization by 6 M |                               |                   |                        |                    |
| GuHCl                 | 1.62                          | 0.95              | 1.54                   |                    |
| Refolding             | 0.98                          | 1.3               | 1.28                   | 82.8               |
| His tag purification  | 0.094                         | 4.5               | 0.423                  | 27.4               |

Inclusion bodies produced in *E. coli* SHuffle T7 Express in 50 mL of LB medium supplemented with ampicillin were used. The solubilized amount of protein is regarded as 100% in recovery ratio.

**Supplementary Table 2. Primers used in this study.**

| Description                                | Target gene                              | Sequence (5'-3')                           |
|--------------------------------------------|------------------------------------------|--------------------------------------------|
| Reverse transcription                      | Lc                                       | ACAGTCACCCCTATTGAAGCT                      |
|                                            |                                          | GCAGTCACCCCTGTTGAAGCT                      |
|                                            |                                          | ACAGTCTCCCCTATTGAAGCT                      |
|                                            | Hc (IgG)                                 | CCATGTGAACTGCACCTCGG                       |
| Hc (IgM)                                   | GGGAAAGGACACTCGCA                        |                                            |
| First PCR                                  | Lc                                       | ATGGACACGAGGGCCCCAC                        |
|                                            |                                          | ATGGACATGAGGGCCCCAC                        |
|                                            |                                          | ATGGACACGAGGGCACCCGC                       |
|                                            |                                          | GTGCCCTGGGTCACCTTGCAG                      |
|                                            |                                          | GTGTCCTGGGTCACCTTGCAGGT                    |
|                                            |                                          | CCCTCGTGCCTGACCTGGCA                       |
|                                            | Hc (both IgG and IgM)                    | ATGGAGACTGGGCTGCGCTGG                      |
| Hc (IgG)                                   | TGACCTCGGGGTGCGTGAGAT                    |                                            |
| Hc (IgM)                                   | GGTACTCCTCTGTGCCCTGGAGGA                 |                                            |
| Second PCR                                 | Lc                                       | CATATGTCTAAAATAAAAAGCSCTTGTGATGACCCAGACTC  |
|                                            |                                          | CATATGTCTAAAATAAAAAGCAGCCGTGCTGCTGACCCAGA  |
|                                            |                                          | CATATGTCTAAAATAAAAAGACCCTRTGCTGACCCAGACTC  |
|                                            |                                          | CATATGTCTAAAATAAAAAGCTCAAGTGCTGACCCAGACTC  |
|                                            |                                          | CATATGTCTAAAATAAAAAGCTGACATTGTGATGACCCAGA  |
|                                            |                                          | CATATGTCTAAAATAAAAAGCATTTCGAATTGACCCAGACTC |
|                                            |                                          | CATATGTCTAAAATAAAAAGATGTTGTGATGACCCAGACTC  |
|                                            |                                          | CATATGTCTAAAATAAAAAGCCTATGATATGACCCAGACTC  |
|                                            |                                          | CATATGTCTAAAATAAAAAGCCATCGAAATGACCCAGACTC  |
|                                            |                                          | CATATGTCTAAAATAAAAAGCAGCCGTGCTGACCCAGACAC  |
|                                            |                                          | CATATGTCTAAAATAAAAAGCCCAAGTGCTGACCCAGACTC  |
|                                            |                                          | CATATGTCTAAAATAAAAAGCCGAAGTAGTGATGACCCAGA  |
|                                            |                                          | CATATGTCTAAAATAAAAAGCCAACATCGTGCTGACCCGTA  |
|                                            | CATATGTCTAAAATAAAAAGTGCCATCCAGATGACCCAGT |                                            |
| AGTATTTATTGGCAACACACACGATGGTGRCTGTTYCAGTTG |                                          |                                            |
| Hc (both IgG and IgM)                      | CATATGTCTAAAATAAAAACAGCAGCTGGAGCAGTCCG   |                                            |
| CATATGTCTAAAATAAAAACAGTCGGTGAAGGAGTCCG     |                                          |                                            |
| CATATGTCTAAAATAAAAACAGTCGTTGGAGGAGTCCG     |                                          |                                            |

|                                                                  |               |                                                                                                                                                                                                                                                                                                                                                                                                                                                                                                                                                                                                                                                                                                     |
|------------------------------------------------------------------|---------------|-----------------------------------------------------------------------------------------------------------------------------------------------------------------------------------------------------------------------------------------------------------------------------------------------------------------------------------------------------------------------------------------------------------------------------------------------------------------------------------------------------------------------------------------------------------------------------------------------------------------------------------------------------------------------------------------------------|
|                                                                  |               | CATATGTCTAAAATAAAAAACAGTCGCTGGAGGAGTCCG<br>CATATGTCTAAAATAAAAAACAGGAGCAGCTGAAGGAG<br>CATATGTCTAAAATAAAAAACAGTCGGTGAAGGACTCCG<br>CATATGTCTAAAATAAAAAACAGGAGCAGTTGAAGGAGTC<br>CATATGTCTAAAATAAAAAACAGTCGGTGGAGGAGTCC<br>CATATGTCTAAAATAAAAAACAGTCCTTGGAGGAGTCC<br>CATATGTCTAAAATAAAAAACAGGAGCAGCTGGAGGAG<br>CATATGTCTAAAATAAAAAACAGCCGTTGGAGGAGTCC<br>CATATGTCTAAAATAAAAAACAGTCGTCGGAGGAGTCC<br>CATATGTCTAAAATAAAAAACAGGCGTTGGAGGAGTCC<br>CATATGTCTAAAATAAAAAACAGCAGCAGCTGATGGAG<br>CATATGTCTAAAATAAAAAACAGCAGCAGCTGGTGGAG<br>CATATGTCTAAAATAAAAAACAGGAGCAGCTGGTGCAG<br>ACCACAACACGGTGCCAGTGGGAAGACTGATGGAGCCTT<br>ACCACAACACGGTGCCAGTGGGAAGACTGACGGAGCCTT<br>GCTAACCAGCGGATACAGAGTTGGAGATGACAGGCTCAC |
| Amplification of pRSET-based vector fragment for Gibson assembly | Hc (IgG)      |                                                                                                                                                                                                                                                                                                                                                                                                                                                                                                                                                                                                                                                                                                     |
|                                                                  | Hc (IgM)      |                                                                                                                                                                                                                                                                                                                                                                                                                                                                                                                                                                                                                                                                                                     |
|                                                                  | Lc            | TGTGTTGCCAATAAATACT<br>TTTTATTTTAGACATATGTATATCTCCTTCTTAAAGTTAAACAAAAT                                                                                                                                                                                                                                                                                                                                                                                                                                                                                                                                                                                                                              |
|                                                                  | Hc (IgG)      | CTGGCACCGTGTTGTGGTG<br>TTTTATTTTAGACATATGTATATCTCCTTCTTAAAGTTAAACAAAAT                                                                                                                                                                                                                                                                                                                                                                                                                                                                                                                                                                                                                              |
| Construction of expression plasmid of clone 22G                  | Hc (IgM)      | CTGTATCCGCTGGTTAGCTGT<br>TTTTATTTTAGACATATGTATATCTCCTTCTTAAAGTTAAACAAAAT                                                                                                                                                                                                                                                                                                                                                                                                                                                                                                                                                                                                                            |
|                                                                  | Hc            | GATCCGGCTGCTAACAAAGCCC<br>ATGATATCTCCTTCTAGATTATTAAGCGTAATCTGGAAC                                                                                                                                                                                                                                                                                                                                                                                                                                                                                                                                                                                                                                   |
|                                                                  | Lc            | TCTAGAAGGAGATATCATATGTCTAAAATAAAAGATGTTG<br>GGGCTTTGTTAGCAGCCGGATC                                                                                                                                                                                                                                                                                                                                                                                                                                                                                                                                                                                                                                  |
|                                                                  | pET22b-vector | GATCCGGCTGCTAACAAAGCCC<br>TTTTATTTTAGACATATGTATATCTCCTTCTTAAAG<br>ATCTCGATCCCGCAAATTAATACG<br>TCCGGATATAGTTCCTCCTTCAG                                                                                                                                                                                                                                                                                                                                                                                                                                                                                                                                                                               |
| Amplification of templates for CFPS, F1 R1                       |               |                                                                                                                                                                                                                                                                                                                                                                                                                                                                                                                                                                                                                                                                                                     |

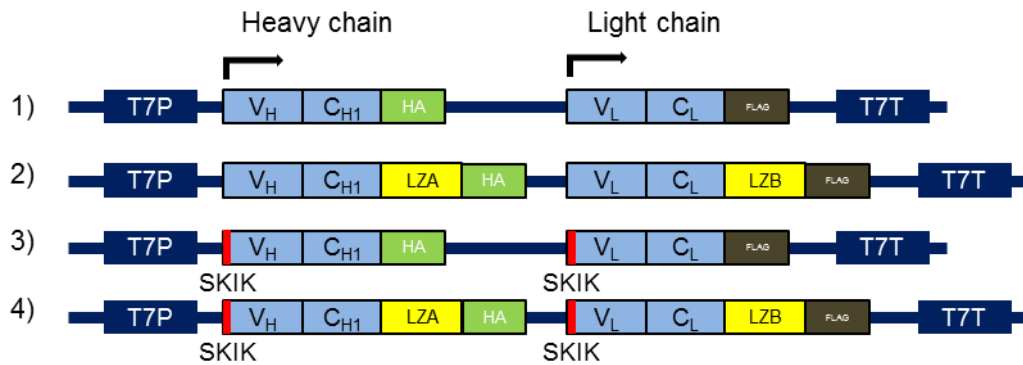

### Supplementary Fig. S1. DNA templates used for CFPS.

Four variations of rabbit anti-*Listeria monocytogenes* monoclonal antibody genes used to assess the effect of leucine zipper fusion and an N-terminal SKIK peptide tag in CFPS. Arrows indicate start positions for open reading frames of heavy and light chains. T7P: T7 promoter, HA: HA tag, FLAG: FLAG tag, T7T: T7 terminator, LZA: leucine zipper A, LZB: leucine zipper B, SKIK: SKIK tag.

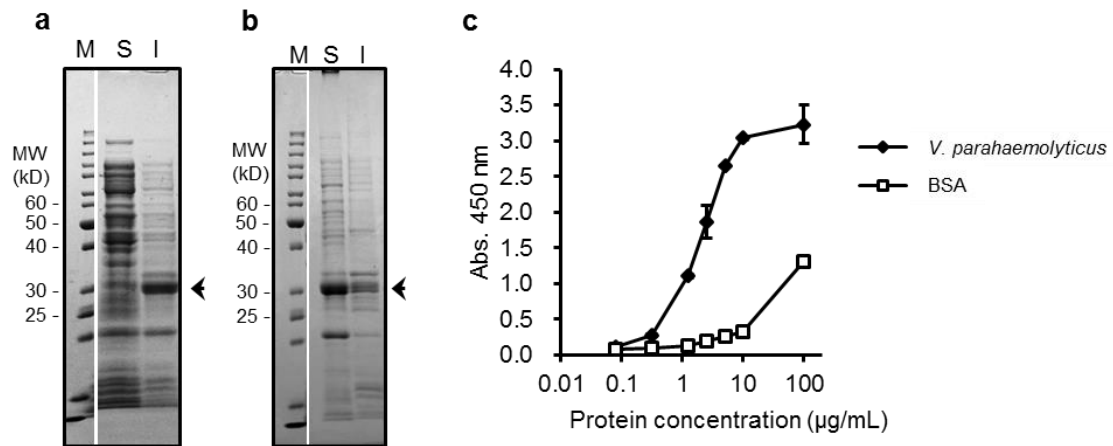

**Supplementary Fig. S2. Analyses of the *E. coli*-expressed and refolded proteins.**

Anti- *V. parahaemolyticus* clone 22G was expressed in *E. coli* as Zipbody with the SKIK tag. M, size markers; Arrow, expected size of overlapping Hc and Lc bands of Zipbody mAb.

**a)** CBB staining of the soluble (S) and insoluble (I) fraction expressed in *E. coli* SHuffle T7 Express on SDS-PAGE.

**b)** CBB staining of the soluble (S) and insoluble (I) fractions after refolding.

**c)** ELISA results for the refolded Zipbody mAb. The solubilized fraction after refolding was analysed by ELISA at various concentrations with *V. parahaemolyticus* and BSA as the antigens.

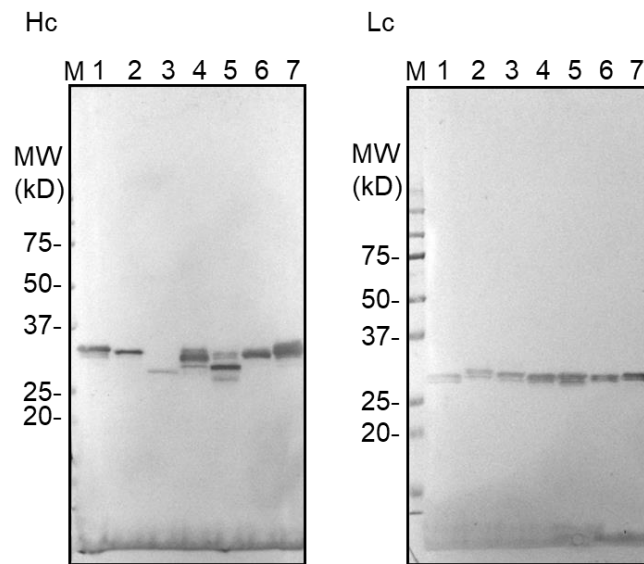

**Supplementary Fig. S3. Full western blotting images of 1  $\mu$ L of anti-*V. parahaemolyticus* Zipbody proteins produced in CFPS.**

Hc and Lc were visualised with anti-HA tag-HRP and anti-His tag-HRP conjugated antibodies, respectively. Sample numbers 1-7 correspond to clones 3G, 5M, 7M, 20G, 22G, 30M, and 36G. The left-hand lane in each image indicates molecular size markers.

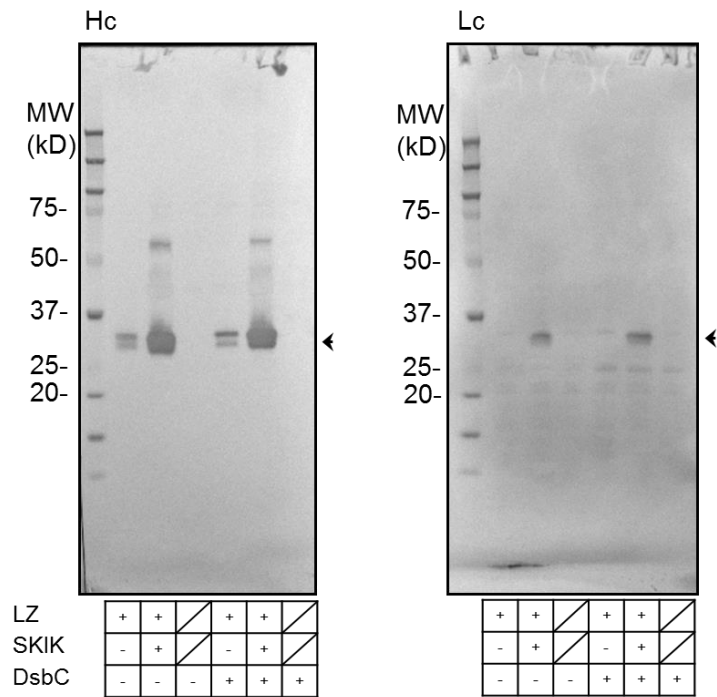

**Supplementary Fig. S4. Full western blotting images of Figure 2b.**

Arrows indicate the target antibody fragments used for Image J analysis. The left-hand lane in each image indicates molecular size markers.



## Supplementary Information for DNA sequences.

End points in the linearised vector are indicated with red slant lines.

>pRSET-IgGCH1-LZA-HAtag

GATCTCGATCCCGCAAATTAATACGACTCACTATAGGGAGACCACAACGGTTTCCTCTAGAAAATAATTTTGTGTTAACTTTAAGAAG  
GAGATATACATATAGTCTAAAATAAAA/CTGGCACCGTGTGGTGTATACCCCAGCAGCACCCTTACCCTGGGTGTCTGGTTAAAG  
GTTATCTGCCGGAACCGGTTACCGTTACCTGGAATAGCGGCACCCTGACCAATGGTGTCTGTACCTTCCGAGCGTTCTGTAGAGCAG  
CGGTCTGTATAGCCTGAGCAGCGTGTGTAGCGTTACCGAGCAGCAGCCAGCCGCTTACCTGTAATGTTGCACATCCGGCAACCAATACC  
AAAGTTGATAAAAACCGTTGACCCGAGCCTGTGGCGGGTGGGAGCGCCAGCTCGAAAAGGAGCTGCAAGCCCTGGGAAAGGAGA  
ACGCCCAGCTCGAATGGGAGCTCCAGGCCCTGGAGAAGGAGCTGGCCCAAGGGCGGTACCATGTACCCATACGATGTCCAGATTA  
CGTTAATAATCTAGAACTTGATCCGGCTCTTAACAAGCCCGGAAGGAAAGCTGAGTTGGCTGCTGCCACCGCTGAGCAATAACTAGC  
ATAACCCCTTGGGCGCTGTAACAGGGTCTTGGGGGTTTTTTGTGTAAGGAGGAACTATATCCGGATCTGGCGTAATACGAAAGG  
CCCCCACCAGTCCGCTTCCCAACAGTTGCGCAGCCTGAATGGCGAATGGGAGCGCCCTGTAGCGCGCATTAAGCGGGCGGGTGT  
GGTGGTTACCGCAGCGTACCCTACACTTCCAGCGCCCTAGCCCGGCTCCTTTCGCTTCTTCCCTTCCCTTCTCGCCAGCCTTC  
GCCGCTTTCGCCGCTCAAGCTTAATCGGGGCTCCTTTAGGGTCCGATTTAGTGTACCAATTTAGGTCGCTTACCGCACTTTCGGGAAA  
ATTAGGGTGTGTTTACGTAGTGGCCATCGCCCTGATAGACGGTTTTTTCGCTTGTAGCTTGGAGTCCAGTCTCTTAATAGTGG  
ACTCTTGTCCAACTGGAACAACACTCAACCCTATCTCGGTCTATTCTTGTATTATAAGGGATTTCGCGGATTTTCGCGCTATTGG  
TTAAAATAATGATGTTTAAACAAAATAATTAACGGCAATTTTAAACAAAATAATTAACGCTTACAATTTAGGTGGCATTTCGGGAAA  
TGTGCGGGAACCCCTATTTGTTATTTTCTAAAATACATTCAAATATGTATCCGCTCATGAGACAATAACCCTGATAAATGCTTCAA  
TAATATTGAAAAGGAAAGATATAGTATTCAACATTTCCGTGTCCGCTTATTCCTTTTTTTCGGCATTTTTCGCTTCTGTATTTG  
CTCACCCGAAAACCGTCTAAACGGTCTTAAAGATGCTGAAGACTGCTGAAAGTGTGGTGCACGAGTGGGTACATCGAAGCTTCCGAAAGG  
TAAGATCCTTGAGAGTTTTCGCCCCGAAAGACGTTTTTCCAATGATGAGCACTTTTAAAGTCTGCTATGTGGCGCGGTATTATCCCGT  
ATTGACGCGCGCAGAGCAACTCGGTGCGCGCATACACTTCTCAGAAATGACTTGGTTGAGTACTACCAGTACAGAAAAGCATC  
TTACGGATGGCATGACAGTAAAGAAATATGCACTGCTGCATACCATAACCTGAGTATAACACTGCGGCCAATTACTTCTGACAACGAT  
CGGAGGACCGAAGGAGCTAACCGCTTTTTTGCACAACATGGGGATCATGTAACCTGCCTTGTATCGTTGGGAACCGGAGCTGAATGAA  
GCCATACCAACGACGAGCGGTGACACCAGTGCCTGTAGCAATGGCAACAACTGCGCAAACTATTAACCTGGCGAACTACTTACTC  
TAGCTTCCCGGCAACAAATTAATAGACTGGATGGAGGCGGATAAAGTTGACAGGCCAATTCTGCGCTCGGCCCTTCCGGCTGGGT  
TATTTGCTGATAAATCTGGAGCCGGTGGAGCGTGGGTCTCGCGGTATCATTTGCAGCACTGGGGCCAGATGGTAAGCCCTCCCGTATCGTA  
GTTATCTACAGCAGCGGGAGTCAGGCAACTATGGATGAACGAAATAGACAGATCGCTGAGATAGGTGCCTCACTGATTAAGCATTTGT  
AACTCTCAGACCAAGTTTACTCATATATACTTTAGATTGATTTAAACTTCATTTTTAATTTAAAGGATTTAGGTGAAGACTCCTTTT  
TGATAATCTCATGACCAAAATCCCTTAACTGTAGTTTTCTGTTCCACTGAGCGTCAGACCCGTAGAAAAGATCAAAGGATCTTCTTGA  
GATCTTTTTTTCGCGCTAATCTGCTGCTTGCAGCAACAAAACACCCGCTACCAGCGGTGGTGTGTTTCGCGCATCAAGAGCTAC  
CAACTTTTTTCCGAAAGTTAAGCTTACCGGTTCCAGCAGGCGAGTACCAAACTGCTTTCTCTAGTGTAGCGTACTAGGCGAACCTT  
CAAGAATCTGTAGCACCCTACATACCTCGCTCTGCTAATCTGTTACCAGTGGCTGCTGCCAGTGGCGATAAGTCTGTCTTACC  
GGTTGGACTCAAGACGATAGTTTACCAGGATAAGGCGCAGCGGTGGGTGAAAGCGGGGGTTCGTGCACACAGCCAGCTTGGAGCGAA  
CGACTACACCGAAGTACACTGAGTACTACAGCGTGCCTACGAAAGCGCCACGCTTCCCGAAGGGAGAAAGCGGACAGGATCCGGT  
AAGCGGCAGGGTTCGGAACAGGAGCGCACGAGGGAGCTTCCAGGGGAAACCGCTGGTATCTTTATAGTCTGTCCGGTTTTTCGCCAC  
CTCTGACTTGTAGCGTCTGATTTTGTGATGCTGCTCAGGGGGCGAGCCCTATGAAAAACGCCAGCAACCGCGCCTTTTTACGGTTTT  
TGGCCTTTTGTCCGGCTTTTGGCTCAGATGTTCTTTCCCTGGTATTCCTGATTTCTGTTGATAACCGTATTACCCCTTTGAGTGAGC  
TGATACCGCTCGCCGACCGAACGACCGAGCGCAGCGAGTCACTGAGCGAGGAAGCGGAAGAGCGCCCAATACCGAAACCGCTCTC  
CCCCGCGTTGGCCGATTCAATATGACG

>pRSET-IgMCH1-LZA-HAtag

GATCTCGATCCCGCAAATTAATACGACTCACTATAGGGAGACCACAACGGTTTCCTCTAGAAAATAATTTTGTGTTAACTTTAAGAAG  
GAGATATACATATAGTCTAAAATAAAA/CTGTATCCGCTGGTTAGCTGTGAAGGTGCACTGACCGGATGGTAATCTGGTTGCAATGGGTT  
GTCGGCACCGTGATTTTCTGCCAGCAGCGTTACCTTTAGCTGGTCTTTAAAACAAACAGCGAAATTAGCAGCCGTACCCTTCGTAC  
CTTTCCGGTTGTAAACGTGGTGAATAACATGCAACACCGACCGTCTGGTTCCGAGCAAAAGATGTTCTGCAGGGCACCGAAGAA  
TATCTGGTTTTGTAAGTTTACGATAGCAATGCAATCTGTAGTCTGAGGTTTACTGTTTCCCGGGCGGTTGGGAGCGCCAGCTCGAAA  
AGGAGCTGCAAGCCCTGGAGAAGGAGAACGCCAGCTCGAATGGGAGCTCCAGGCCCTGGAGAAGGAGCTGGCCCAAGGGCGGTAC  
CATGTACCCATACGATGTTCCAGATTAAGCTTAATACTTAGAATCTGATCCGGCTGCTAACAAGCCCGCAAAGGAAAGCTGAGTTGGC  
TGCTGCCACCGCTGAGCAATAAAGTAACTAGCAATAACCCCTTGGGCGCTTAAACGGGCTTTGAGGGGTTTTTTCGCAAGGAGAACTATA  
TCCGGATCTGGCGTAATAGCGAAGAGGCCCGCACCAGTCCGCTTCCCAACAGTTGCGCAGCCTGAATGGCGAATGGGACCGCCCTG  
TAGCGGCGGATTAAGCGCGGCGGGTGTGGTGGTTACGCGCAGCGTACCGCTACACTTGGCAGCGCCCTAGCGCCGCTCTTTCGCT  
TTCTTCCCTTCCCTTCTCGCCAGCTTTCGCGGCTTCCCGGCTCAAGCTTAAATAGACTGAGTAAAGGAGGTTTTCGCAAGGAGAACTATA  
TACGGCACCTCGACCCAAAACCTTATTAGGGTGTAGGTTACCGTGTGGCCATCGCCCTGATAGACGGTTTTTCGCTTGTGAC  
GTTGGAGTCCACGTTCTTTAATAGTGGACTTGTGTCAAACAGCAACACTCAACCCTATCTCGGTCTATTCTTTGATTTATAA  
GGGATTTTTCGGCTTTTCCGGCTATTGGTTAAAATAATGAGCTGATTTAAACAAAATAATTAACGCAATTTTAAACAAAATAATTAACGCTTA  
CAATTTAGGTGGCACTTTTTCGGGAAATGTGCGCGGAACCCCTATTTGTTAATTTTCTAAAATACATTCAAATATGTATCCGCTCATG  
AGACAATAACCCCTGATAAATGCTTCAATAATATTGAAAAGGAAAGATATGAGTATTCAACATTTCCGTGTCCGCTTATTCCCTTTT  
TTGGCGCATTTTCGCTTCCGTTTGTGCTCACCCAGAAACCGCTGGTGAAGAGTAAAGATGCTGAAGATCAGTTGGGTGCACGATGGG  
TTACATCGAAGTGGATCTCAACAGCGGTAAGATCTTGAGAGTTTTTCGCCCCGAAAGACGTTTTTCCAATGATGAGCACTTTTAAAGTT  
CTGCTATGTTGGCGCGGTATTATCCCGTATTGACGCGGGGCAAGAGCAACTCGGTGCGCGCATACACTATTCTCAGAAATGACTTTGGT  
AGTACTCACCACTACAGAAAAGCACTTTACGGATGGCATGACAGTAAGAGAATTAATGCAAGTAAAGATGCTGAAGTGCATGCCATAACCA  
TGCGGCCAATTACTTCTGACAACGATCGGAGGACCGAAGGAGCTAACCGCTTTTTTGCACAACATGGGGGATCATGTAACCTCGCTT  
GATCGTTGGGAACCGGAGCTGAATGAAGCCATACCAACAGCAGCGGTGACACCAGATGCTGTAGCAATGGCAACAACGTTGCGCA  
AACTATTAAGTGGCAACTTACTTACTCTAGCTTACCGGCAACAATAATAGACTGGATGGAGGCGGATAAAGTTGCAAGCACTTCT  
CGCTCGGCCCTTCCGGCTGGTGGTTTTATGCTGATAAATCTGGAGCCGGTGGAGCTGGGCTCGCGGTATPCATTTGAGCACTGGGG  
CCAGATGGTAAGCCCTCCCGTATCGTAGTTATCTACAGCAGGGGAGTCAAGCAACTATGGATGAACGAAATAGACAGATCGCTGAGA  
TAGTGCTTCACTGATTAAGCAATTAAGCACTGTCAGACCAAGTTTACTCATATATACTTTAGATTTGATTTAAAACCTTCAATTTAAT  
TAAAGGATCTAGGTGAAGATCCTTTTTGATAATCTCATGACCAAAATCCCTTAAAGTGTGTTTTCTGTTCCACTGAGCGTCAGACCC  
GTAGAAAAGATCAAGGATCTTCTTGAGATCCTTTTTCTGCGCTAATCTGTCTGTGCAAAACAAAACACCCGCTACAGCCGG  
TGTTTTGTTTTGCGGATCAAGAGCTACCAACTTTTTTCCGAAGTAACTGGCTTACAGCAGTAAAGTGGCTTACAGCAGCGCAGATCACTA  
AGTGTAGCCGTAGTTAGGCCAACCTTCAAGAATCTGTAGCACCCTACATACCTCGCTCTGCTAATCTGTACCAGTGGCTGCT  
GCCAGTGGCGATAAGTGTCTTACCAGGTTGGACTCAAGACGATAGTTACCAGGATAAGGCGCAGCGGTGGGCTGAACGGGGGGTT  
CGTGCACAGCCAGCTTTGGAGCGAACCACCTACACCGAATGAGATCACTACCGCTGAGCTATGAGAAAGCGCCAGCTTCCGCA  
AGGGAAGAAAGGGGACAGGTATCCGGTAAGCGGCAAGGTCGGAACAGGAGAGCGCACGAGGGAGCTTCCAGGGGAAACCGCTGGTAT  
CTTTATAGTCTGTCTGGTTTTTCGCCACCTCTGACTTGGAGCTCGATTTTTGTTGATGCTGCTGCAAAACAAAACACCCGCTACAGCCGG  
CCAGCAACCGCCTTTTTTACGGTTCTTGGCTTTTGTGCTGCTTTTTGCTCATATGTTTTCTTCCGCTTATCCCTGATTTGTGGA  
TAACCGTATTACCGCTTTGAGTGAGCTGATACCGCTCGCCGACCGAACGACCGAGCGCAGCGAGTCACTGAGCGAGGAAGCGGAA  
GAGCGCCCAATACGCAACCGCCTTCCCGCGCTTGGCCGATTCAATATGACG

>pRSET-CL-LZB-Histag  
GATCTCGATCCCAGCAAATTAATACGACTCACTATAGGGAGACCACAACGGTTCCCTCTAGAAATAATTTGTTTAACTTTAAGAAG  
GAGATATACATATGTCTAAAATAAAA/TGTGTTGCCAATAAATACTTTCCGGATGTTACCCTTACCTGGGAAGTTGATGGCACCACCC  
AGACCACCGGTATTGAAAAATAGCAAAACACCGCAGAATAGCGCAGATTGTACCTATAATCTGAGCAGCACCTGACCCTGACCAGCAC  
CCAGTATAACAGCCATAAAGAATATACCTGCAAAGTGACCCAGGGTACAACCAGCGTTGTTTACAGAGCTTAAATCGTGGTGTGTTGGC  
GGTGGTGGGAGCGCCAGCTCAAGAAGAAGCTGCAAGCCCTGAAGAAGAAGAACGCCAGCTCAAGTGGAAAGCTCCAGGCCCTGAAGA  
AGAAGCTGGCCAGAAAGGGCGGTTCCCATCATCATCACCATCACTAATAATCGACTTGATCCGGCTGCTAACAAAGCCCGAAAGGAAG  
CTGAGTTGGCTGCTGCCACCGTGAGCAATAACTAGCATAACCCCTTGGGGCTCTAAACGGGTCTTGAGGGGTTTTTTGCTGAAAGG  
AGGAACTATATCCGGATCTGGCGTAATAGCGAAGAGGCCCGCACCGATCGCCCTTCCCAACAGTTGCGCAGCCTGAATGGCGAATGGG  
ACCGCCCTGTAGCGCGCATTAAGCGCGCGGGTGTGGTGGTTACGCGCAGCGTGACCGCTACACTTGCCAGCGCCCTAGCGCCCGC  
TCCTTTCGCTTCTTCCCTTCCCTTCTCGCCACGTTCCGGCTTCCCGTCAAGCTCTAAATCGGGGGCTCCCTTTAGGGTTCCGA  
TTTTAGTGTCTTACGGCACCTCGACCCCAAAAACTTGATTAGGGTGTGTTTACGTTAGTGGCCATCGCCCTGATAGACGGTTTTTC  
GCCCTTTGAGCTTGGAGTCCACGTTCTTTAATAGTGGACTCTTGTCCAACCTGGAACAACACTCAACCCCTATCTCGGTCTATTCTTT  
TGATTTATAAGGATTTTGGCGATTTCCGGCTATTGGTTAAAAAATGAGCTGATTTAACAAAAATTAACGCGAATTTTAAACAAAAA  
TTAACGCTTACAATTTAGGTGGCACTTTTCGGGAAATGTGCGCGGAACCCCTATTTGTTTATTTTTCTAAATACATTCAAATATGTA  
TCCGCTCATGAGACAATAACCCCTGATAAATGCTTCAATAATATTGAAAAAGGAAGATATGAGTATTCACATTTTCCGTGTCCGCCCT  
ATTCCTTTTTTGGCGCATTTTGCCTTCCGTTTTTGCTCACCCAGAACGCTGGTGAAGTAAAAGATGCTGAAGATCAGTTGGGTG  
CACGAGTGGGTTACATCGAAGTGGATCTCAACAGCGGTAAGATCCTTGAGAGTTTTTCCCGCGAAGAAGCTTTTCCAATGATGAGCAC  
TTTTAAAGTTCTGCTATGTGGCGCGGTATTATCCCGTATTGACCGCGGGCAAGAGCAACTCGGTCCCGCGATACACTATTCTCAGAAT  
GACTTGGTTGAGTACTACCAGTACAGAAAAGCATCTTACGGATGGCATGACAGTAAGAGAATTTATGAGTGTGCCATAACCATGA  
GTGATAAAGTGGCGCAACTTACTTCTGACAACGATCGGAGGACCGAAGGAGCTAACCGCTTTTTTGCACAACATGGGGGATCATGT  
AACTCGCCTTGATCGTTGGGAACCGGAGCTGAATGAAGCCATACCAACGACGAGCGTGACACCACGATGCCTGTAGCAATGGCAACA  
ACGTTGCGCAAACTATTAAGTGGCAACTACTTACTCTAGCTTCCCGCAACAATTAATAGACTGGATGGAGGCGGATAAAGTTGCAG  
GACCACTTCTGCGCTCGGCCCTTCCGGCTGGTGGTTTTATTGCTGATAAATCTGGAGCCGGTGGAGCTGGGTCTCGCGGTATCATTC  
AGCACTGGGCGCAGATGGTAAGCCCTCCCGTATCGTAGTTATCTACACGAGGGGAGTCAAGCAACTATGGATGAACGAAAATAGACAG  
ATCGCTGAGATAGGTGCCTCACTGATTAAGCATTGGTAACGTGTCAGACCAAGTTTACTCATATATACTTTAGATTGATTTAAAACCTC  
ATTTTTAATTTAAAAGGATCTAGGTGAAGATCCTTTTTGATAATCTCATGACCAAAATCCCTTAACGTGAGTTTTCGTTCCACTGAGC  
GTCAGACCCCGTAGAAAAGATCAAAGGATCTTCTTGAGATCCTTTTTTTCTGCGCGTAATCTGCTGCTTGCAAAACAAAAAACCCCG  
CTACCAGCGGTGGTTTTGTTTGGCGGATCAAGAGCTACCAACTCTTTTTCCGAAGGTAACCTGGCTTACGACGAGCGAGATACCAATA  
CTGTTCTTCTAGTGTAGCCGTAGTTAGGCCACCACTTCAAGAAGTCTGTAGCACCCTACATACCTCGCTCTGCTAATCCTGTTACC  
AGTGGCTGCTGCCAGTGGCGATAAGTCTGTCTTACCAGGTTGGACTCAAGACGATAGTTACCAGGATAAGGCGCAGCGGTGGGCTGA  
ACGGGGGGTTCGTTGCACACAGCCAGCTTGGAGCGAACGACCTACACCGAAGTACGATACCTACAGCGTGAAGTATGAGAAAAGCGCA  
CGCTTCCCGAAGGGAGAAAGGGGGACAGGTATCCGGTAAGCGGCAGGGTCCGAACAGGAGAGCGCACGAGGGAGCTTCCAGGGGAAA  
CGCTGGTATCTTTATAGTCTGTCCGGTTTCGCCACCTCTGACTTGAGCGTCGATTTTTGTGATGCTCGTCAGGGGGCGGAGCCTA  
TGGAAAAACGCCAGCAACCGCGCCCTTTTTACGGTTCTTGGCCTTTTGGCTGGCCTTTTGGCTCACATGTTCTTCTCGGTTATCCCTG  
ATTCTGTGGATAACCGTATTACCGCTTTGAGTGAAGTGTATACCGCTCGCCGAGCCGACGACCGAGCGCAGGAGTCAAGTGAAGCA  
GGAAGCGGAAGAGCCCAATACGCAAACCGCCTCTCCCGCGCTTGGCCGATTCAATTAATGCAG
